# Supplementary material for: Switching between upconversion luminescence imaging and therapy in vitro enabled by NIR excitation modulation of nanocomposites
Source: Royal Society of Chemistry journal article supplement (doi:10.1039/d4tc01535e), 2024-01-01
Supplement: d4tc01535e1.pdf [file d4tc01535e1.pdf]

## Supporting Information

### Switching between upconversion luminescence imaging and therapy *in vitro* enabled by NIR excitation modulation of nanocomposite

Yuan Jiang,<sup>†a</sup> Yale Hong,<sup>†a</sup> Yuan-Yuan Liu,<sup>b</sup> Yue Guan,<sup>a</sup> Junxun Zhou,<sup>c</sup> Haifang Wang<sup>\*b</sup> and Lining Sun<sup>\*a</sup>

*a* Department of Chemistry, College of Sciences, Shanghai University, Shanghai 200444, China

E-mail: [lnsun@shu.edu.cn](mailto:lnsun@shu.edu.cn)

*b* Institute of Nanochemistry and Nanobiology, School of Environmental and Chemical Engineering, Shanghai University, Shanghai 200444, China

E-mail: [hwang@shu.edu.cn](mailto:hwang@shu.edu.cn)

*c* School of Medicine, Shanghai University, Shanghai, 200444, China

<sup>†</sup> These authors contributed equally to this work.

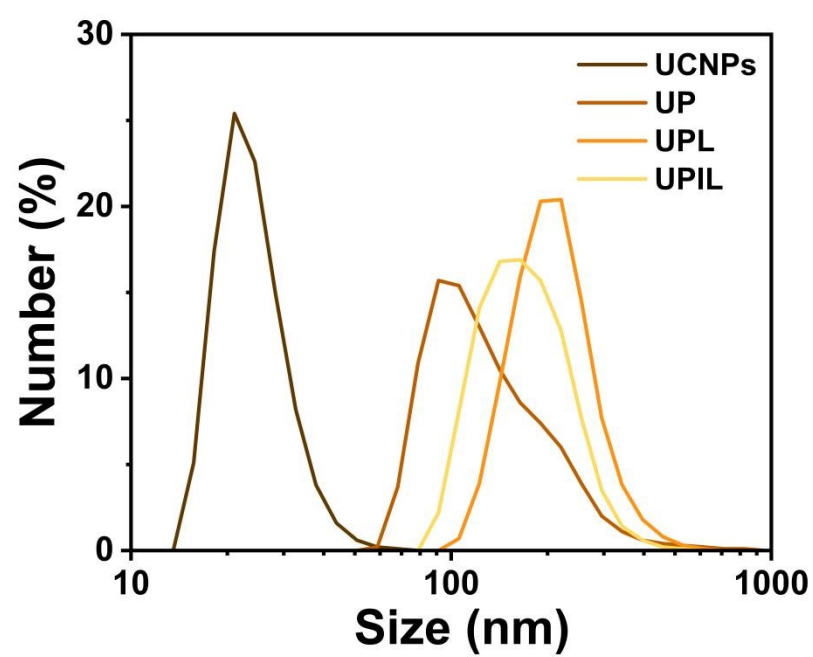

**Figure S1.** Dynamic light scattering (DLS) of UCNPs, UP, UPL, and UPIL.

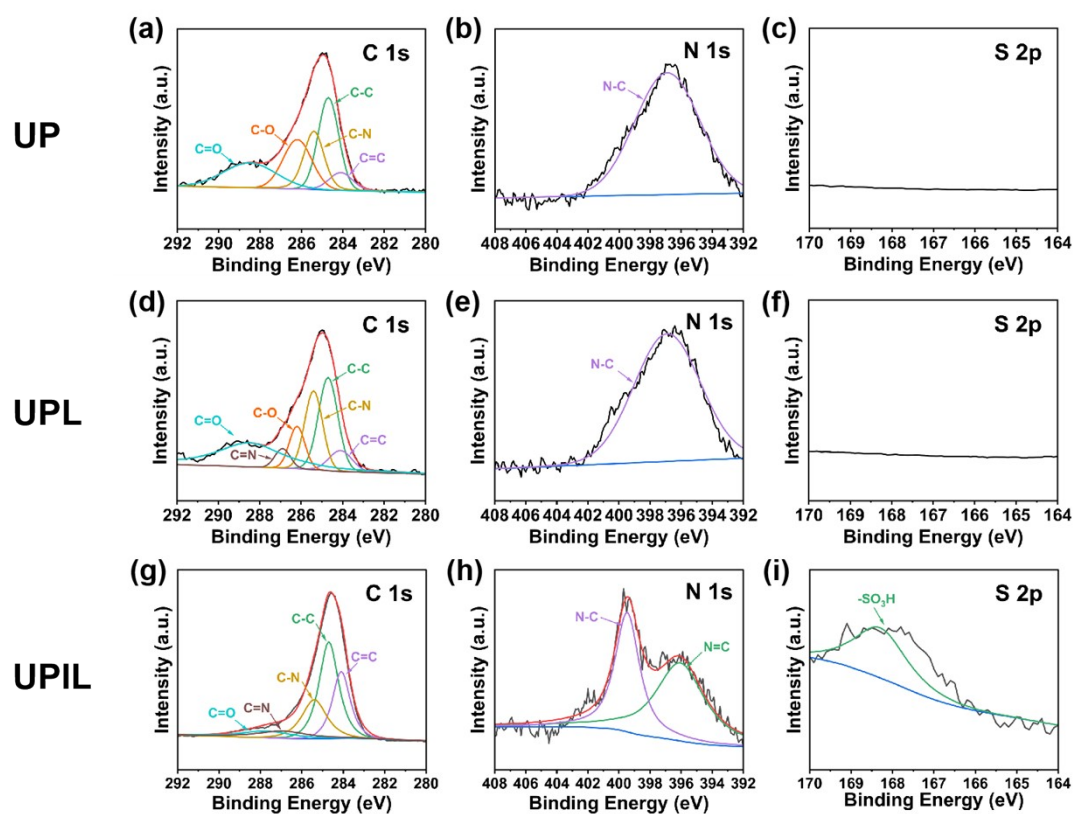

**Figure S2.** High-resolution X-ray photoelectron spectroscopy (XPS) spectra of C 1s (a, d, g), N 1s (b, e, h), and S 2p (c, f, i) as measured on UP (a - c), UPL (d - f), and UPIL (g - i), respectively.

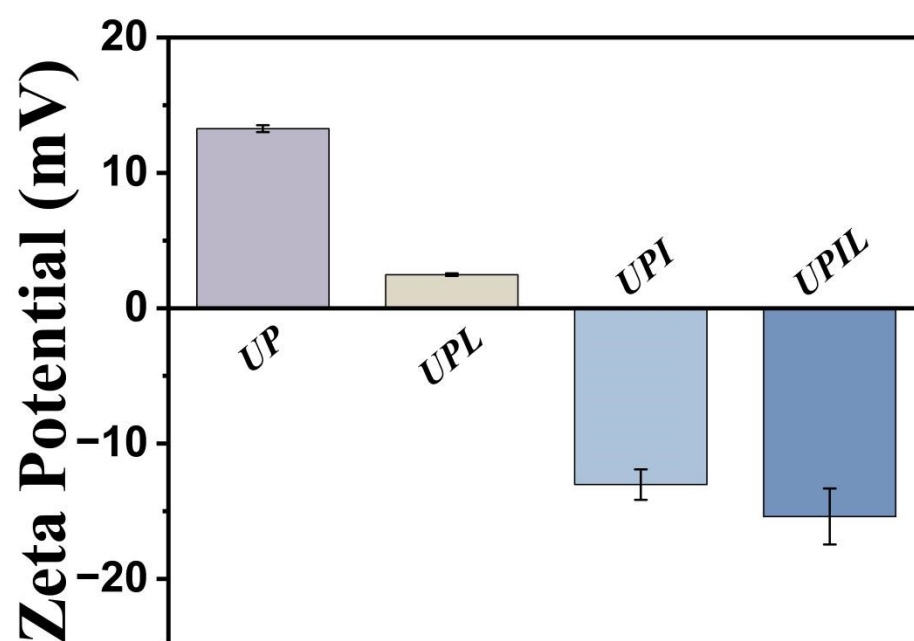

**Figure S3.** Zeta potentials of UP, UPL, UPI, and UPIL nanocomposite.

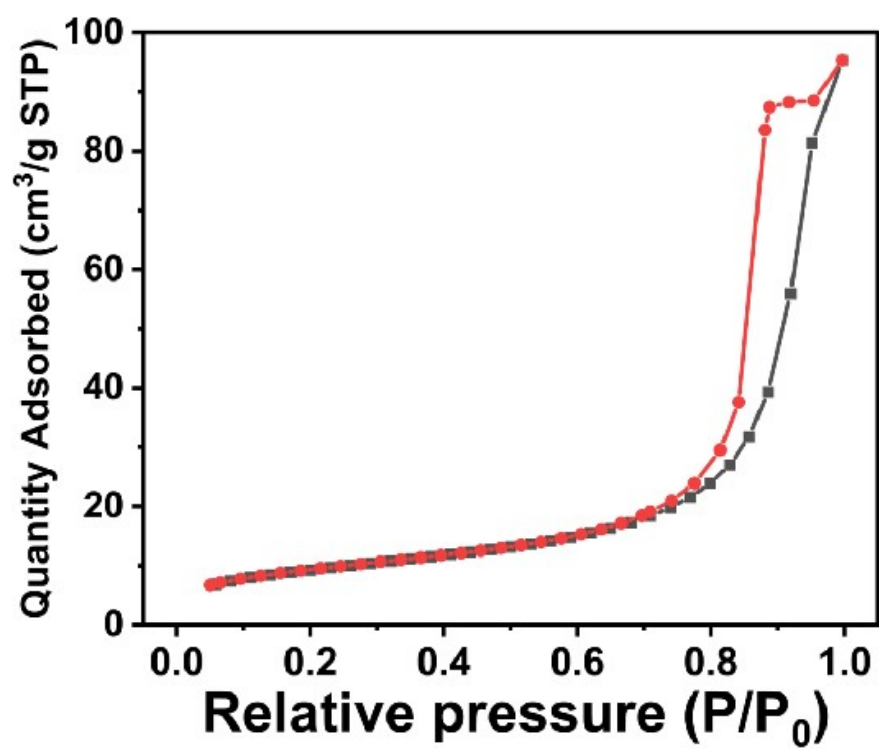

**Figure S4.** Nitrogen adsorption-desorption curve of UP.

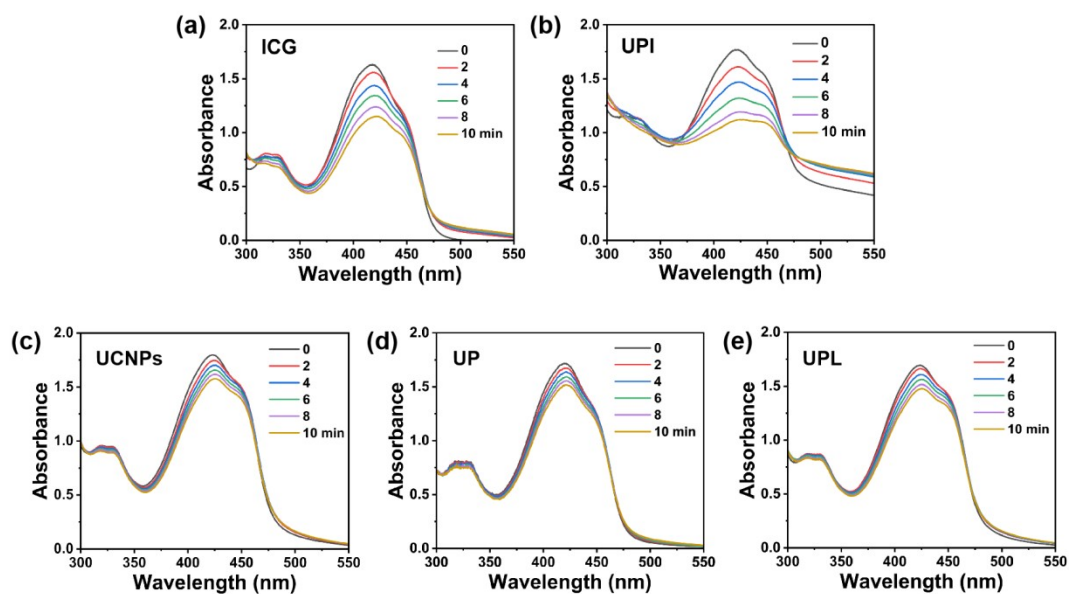

**Figure S5.** Time-dependent absorbance spectra of ICG (a), UPI (b), UCNPs (c), UP (d), and UPL (e) co-incubated with DPBF, respectively, then irradiated by 808 nm laser ( $0.7 \text{ W/cm}^2$ , for 0, 2, 4, 6, 8, and 10 minutes, respectively).

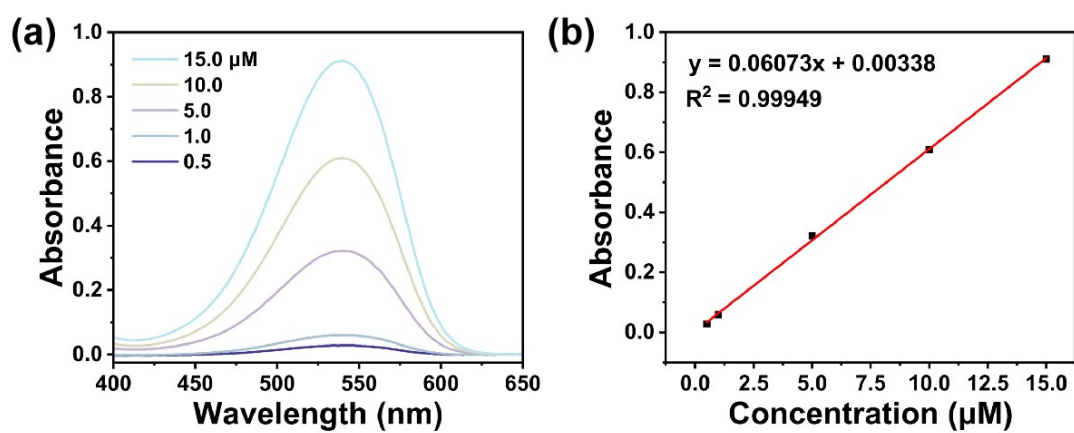

**Figure S6.** (a) The absorption spectra of Griess agent for different concentrations of  $\text{NaNO}_2$  from 0.5 to 15  $\mu\text{M}$ . (b) The responding absorbance of Griess agent to NO at 540 nm in Fig. S6 (a).
